# Supplementary material for: Shape Matters: Plant Architecture Affects Chemical Uniformity in Large-Size Medical Cannabis Plants
Source: MDPI journal article supplement (doi:10.3390/plants10091834), 2021-09-03
Supplement: s1 [file s1]

## **Supplementary material**

### **Shape matters: plant architecture affects chemical uniformity in large-size medical cannabis plants**

**Nadav Danziger and Nirit Bernstein \***

Institute of Soil water and Environmental Sciences, Volcani Center, 68 HaMaccabim Road  
P.O.B 15159 Rishon LeZion, 7505101, Israel

\* Correspondence: Dr. Nirit Bernstein: [Nirit@agri.gov.il](mailto:Nirit@agri.gov.il)

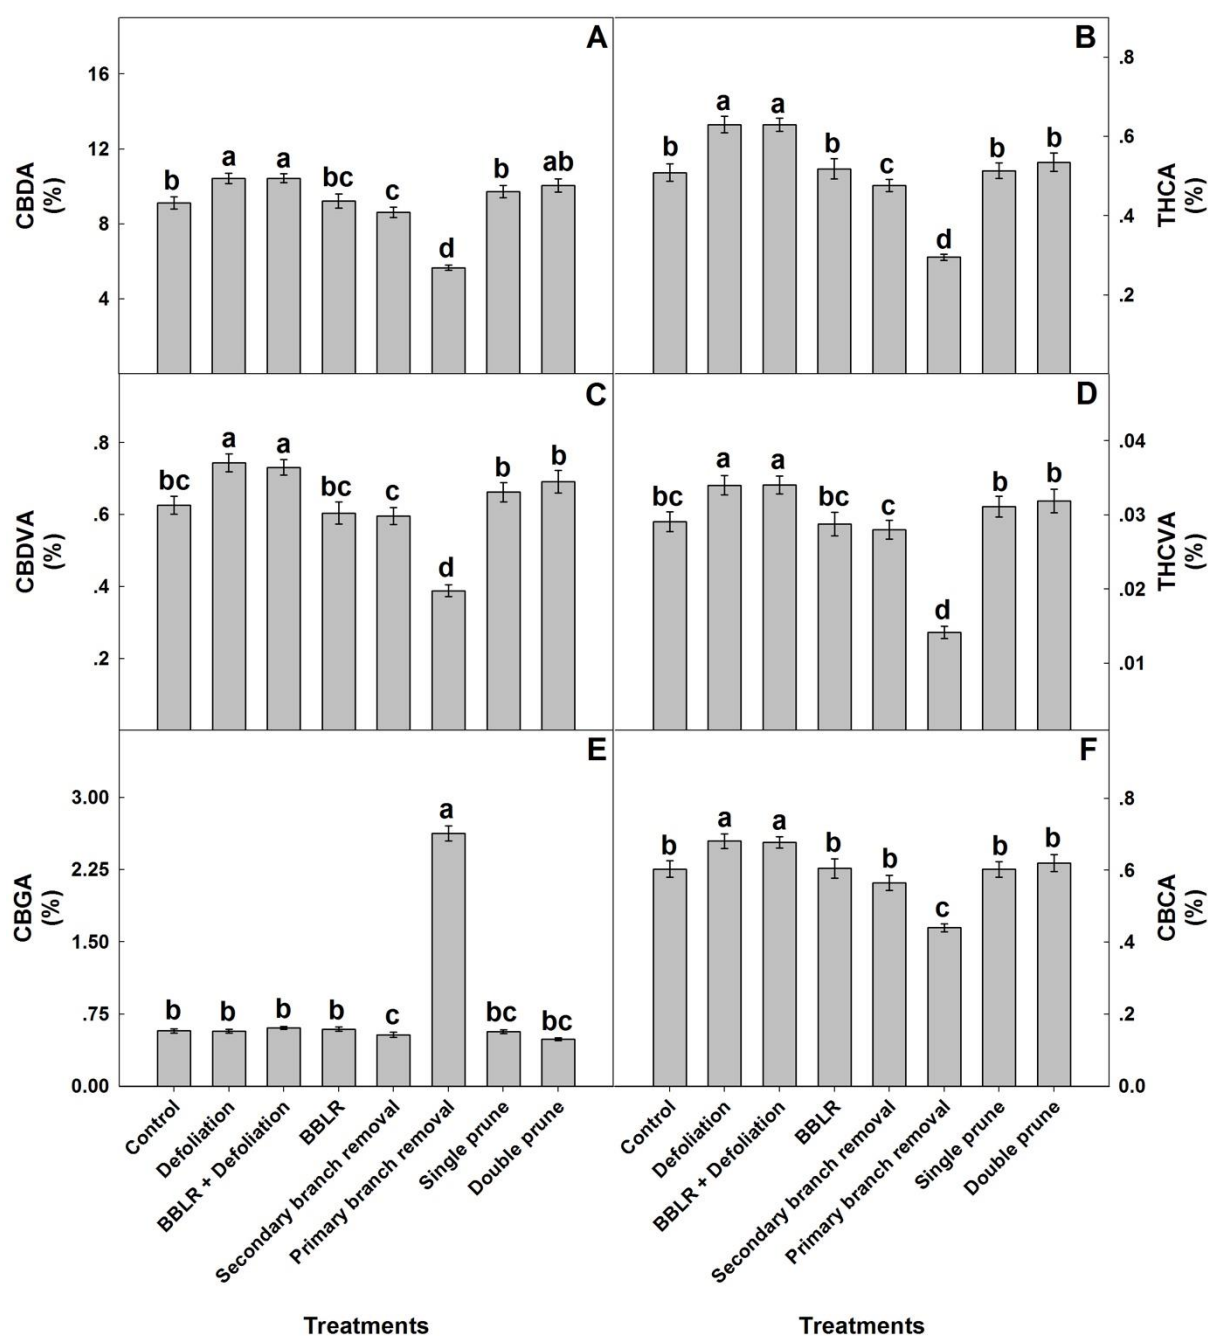

**Figure S1.** Impact of plant architecture treatments on cannabinoid concentrations in the **apical inflorescence of the main stem (location 1)** of medical cannabis plants CBDA (A), THCA (B), CBDVA (C), THCVA (D), CBGA (E) and CBCA (F). Data are means  $\pm$  SE (n=6). Lowercase letters above the bars represent significant differences between treatments by Tukey HSD test at  $\alpha=0.05$ .

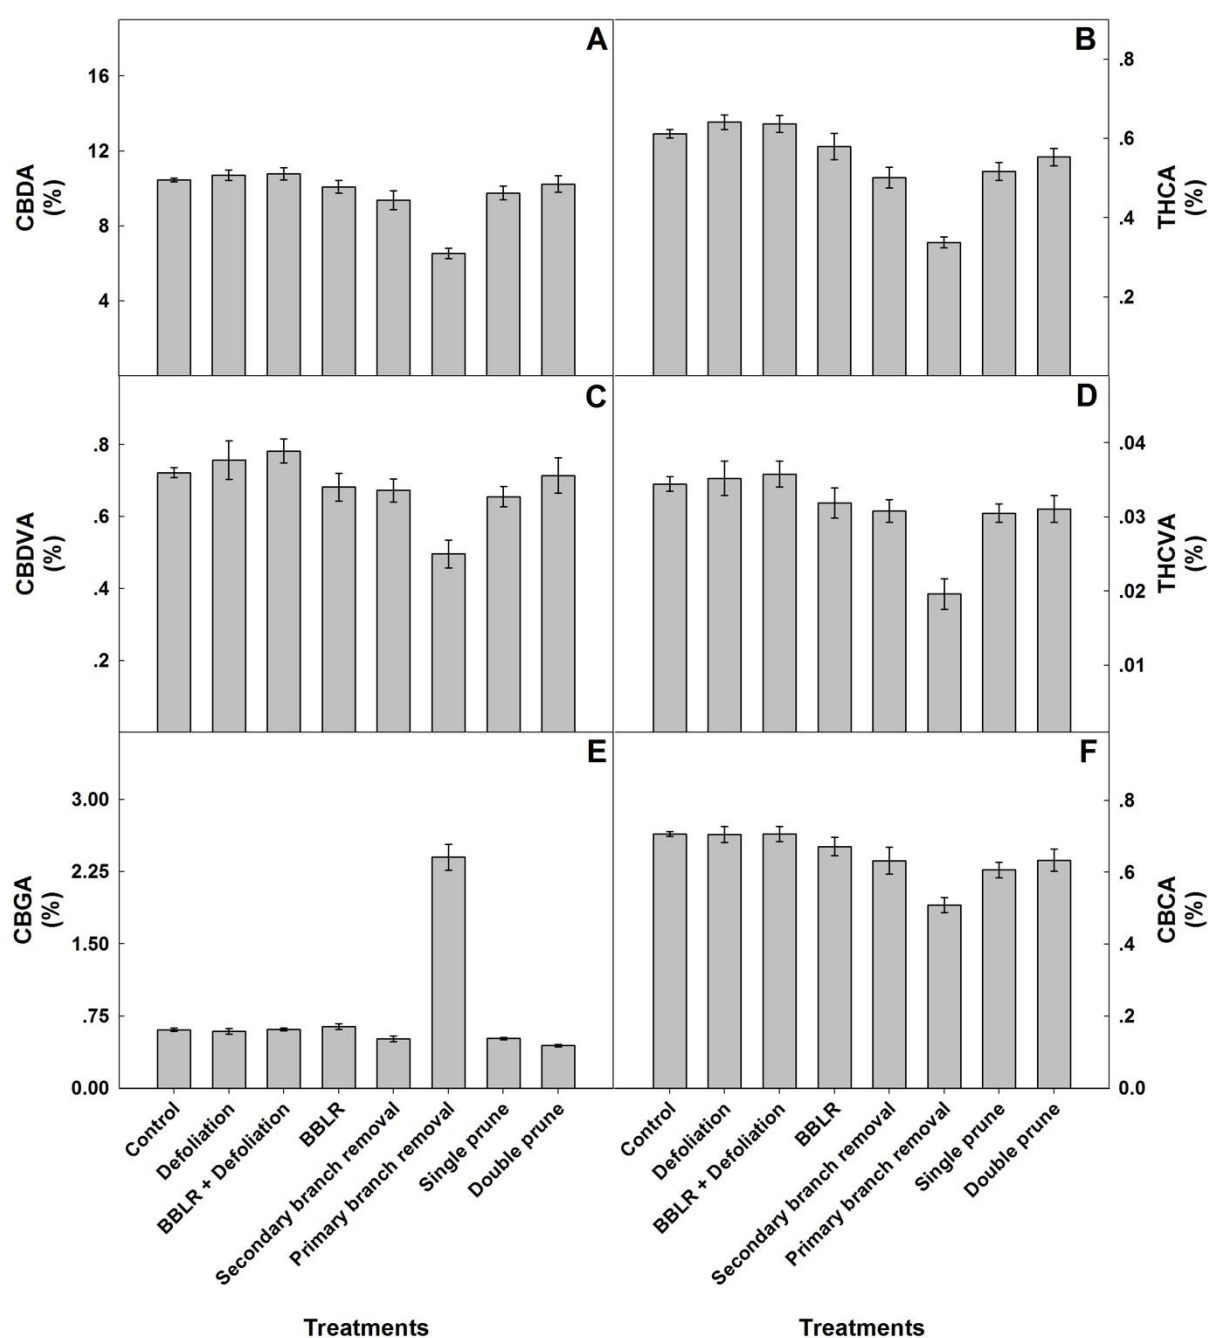

**Figure S2.** Impact of plant architecture treatments on cannabinoid concentrations at the apical inflorescence from a 1° branch, from the top 1/3 of the plant (**location 2**) of medical cannabis plants CBDA (A), THCA (B), CBDVA (C), THCVA (D), CBGA (E) and CBCA (F). Data are means  $\pm$  SE (n=6).

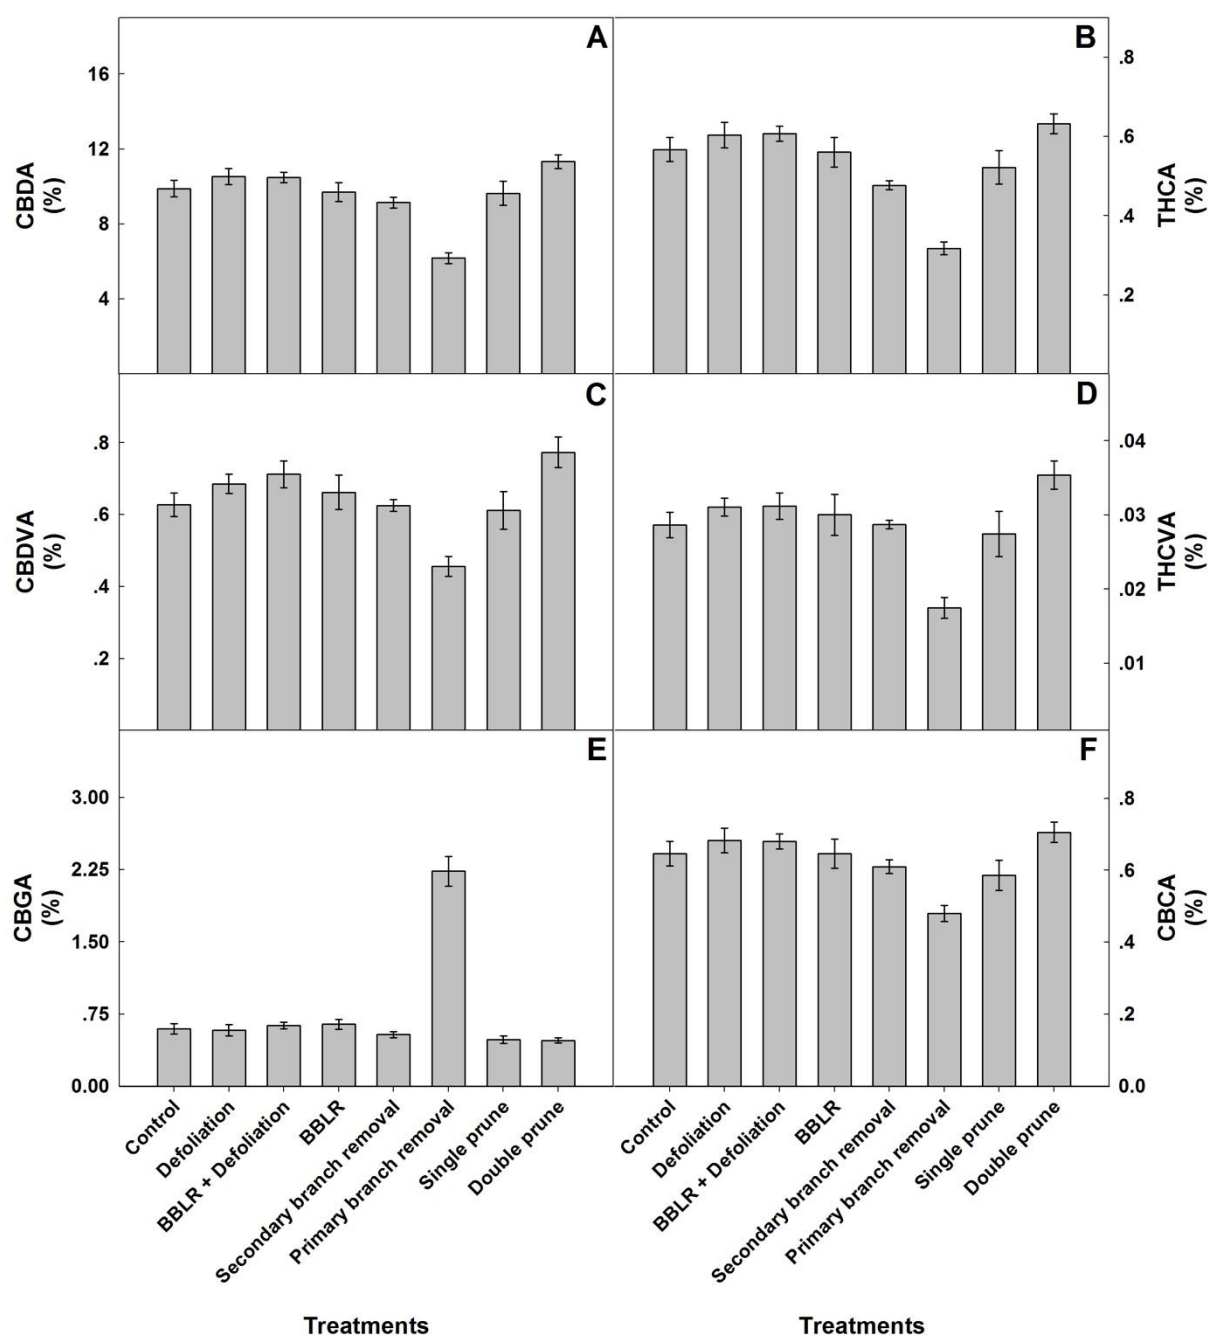

**Figure S3.** Impact of plant architecture treatments on cannabinoid concentrations in an apical inflorescence of a 1° branch from the bottom 1/3 of the plant (location 3) of medical cannabis plants CBDA (A), THCA (B), CBDVA (C), THCVA (D), CBGA (E) and CBCA (F). Data are means  $\pm$  SE (n=6).

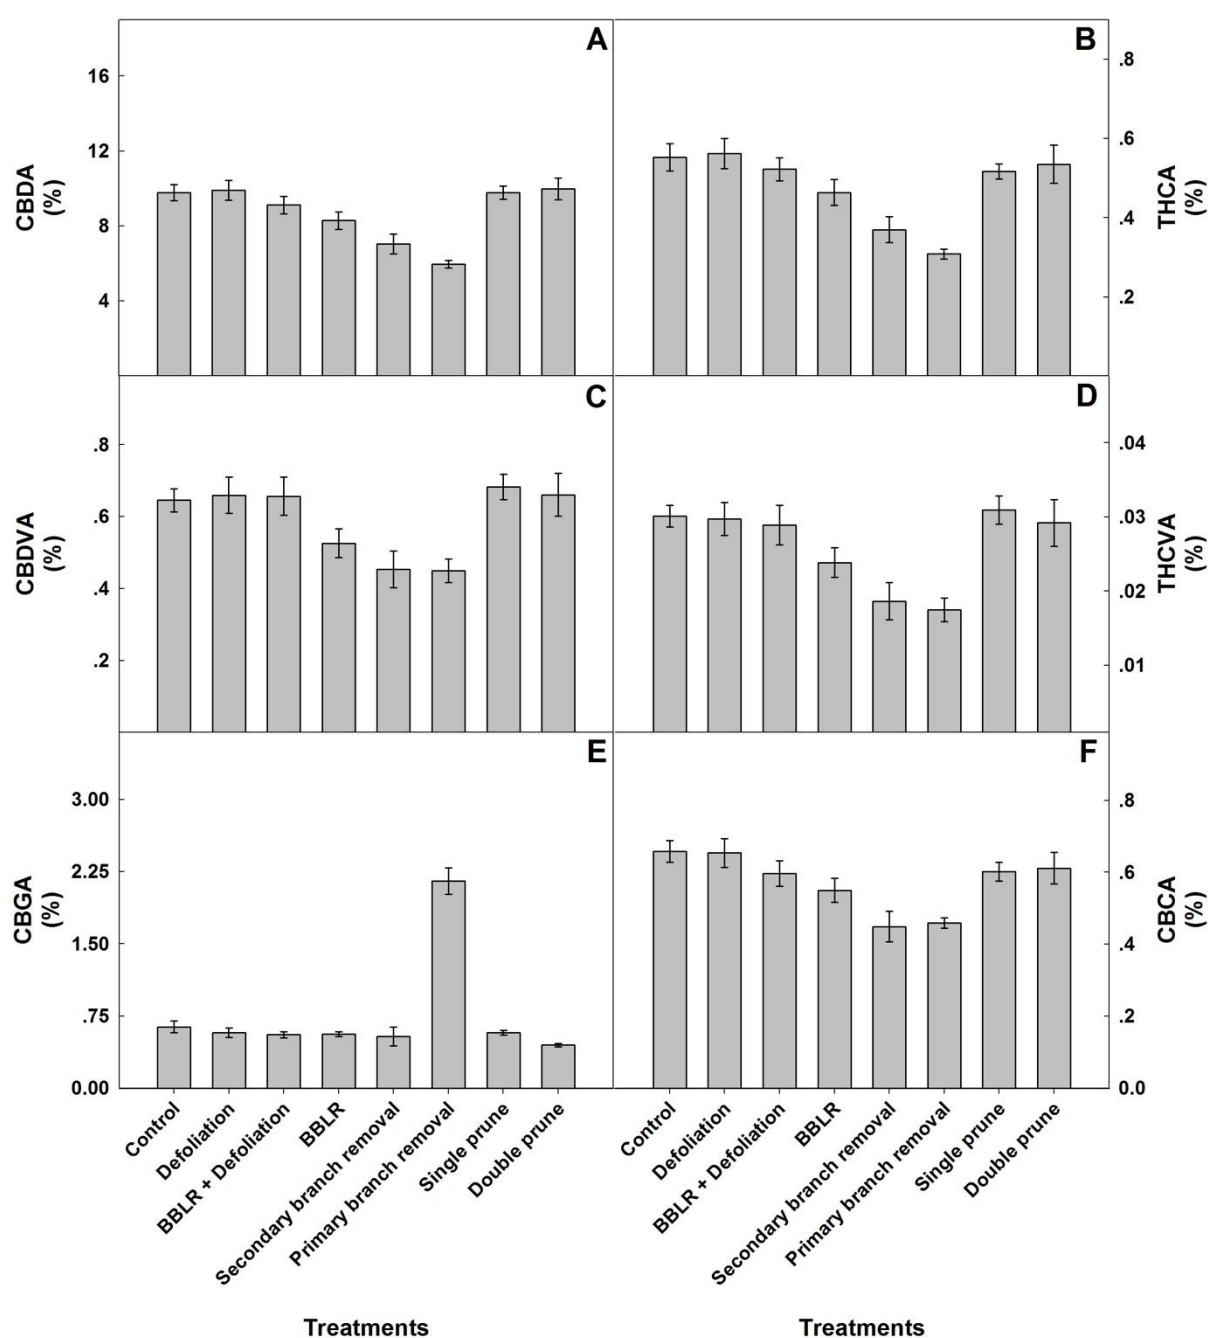

**Figure S4.** Impact of plant architecture treatments on cannabinoid concentrations in an axillary inflorescence close to the stem from an upper branch (location 4) of medical cannabis plants CBDA (A), THCA (B), CBDVA (C), THCVA (D), CBGA (E) and CBCA (F). Data are means  $\pm$  SE (n=6).

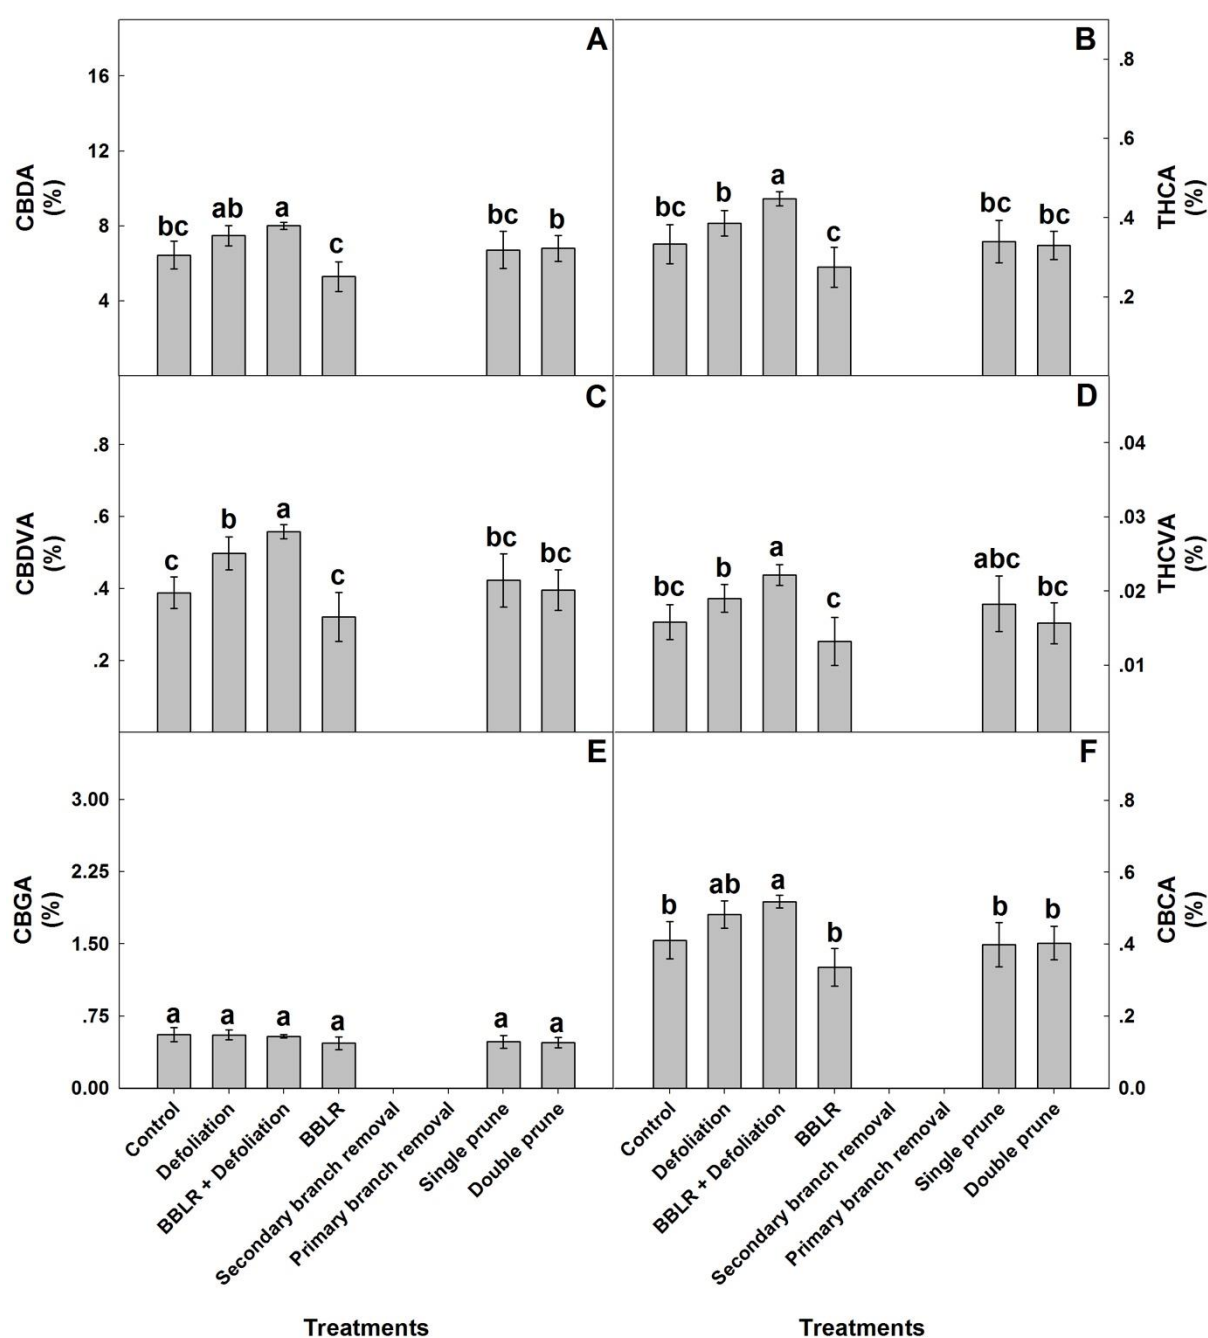

**Figure S5.** Impact of plant architecture treatments on cannabinoid concentrations in an axillary inflorescence close to the stem, from the bottom of the plant (location 5) of medical cannabis plants CBDA (A), THCA (B), CBDVA (C), THCVA (D), CBGA (E) and CBCA (F). Data are means  $\pm$  SE (n=6). Lowercase letters above the bars represent significant differences between treatments by Tukey HSD test at  $\alpha=0.05$ .
